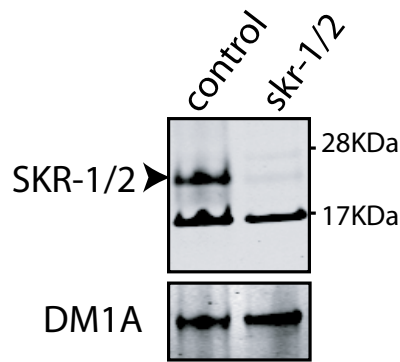

**Fig. S1.** *Skr-1/2(RNAi)* conditions deplete SKR-1 and SKR-2 proteins. Western blotting of embryo extracts from *control(RNAi)* and *skr-1/2(RNAi)* treated worms. The SKR-1/2 antibody, which recognizes both SKR-1 and SKR-2, shows that protein levels are significantly depleted after RNAi treatment (arrowhead). DM1A antibody was used as a loading control.

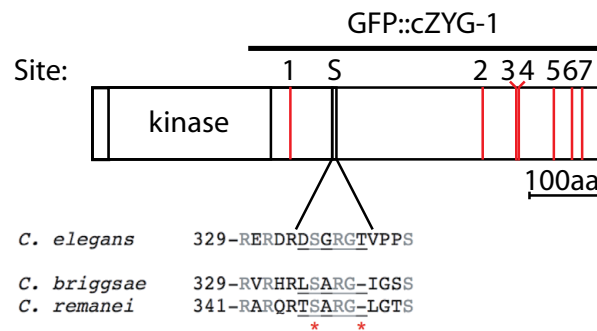

| Site | Position | WT Sequence | Mutated sequence |
|------|----------|-------------|------------------|
| 1    | 275      | SREHS       | AREHA            |
| 2    | 544      | TKVNE       | AKVNA            |
| 3    | 590      | SLMPS       | ALMPA            |
| 3/4  | 596      | SLMPS/SSQTS | ALMPA/ASQTA      |
| 5    | 642      | TDENS       | ADENA            |
| 6    | 668      | SIQAT       | AIQAA            |
| 7    | 681      | TSKAD       | ASKAA            |
| S    | 350      | DSGRGT      | AAGRGT           |

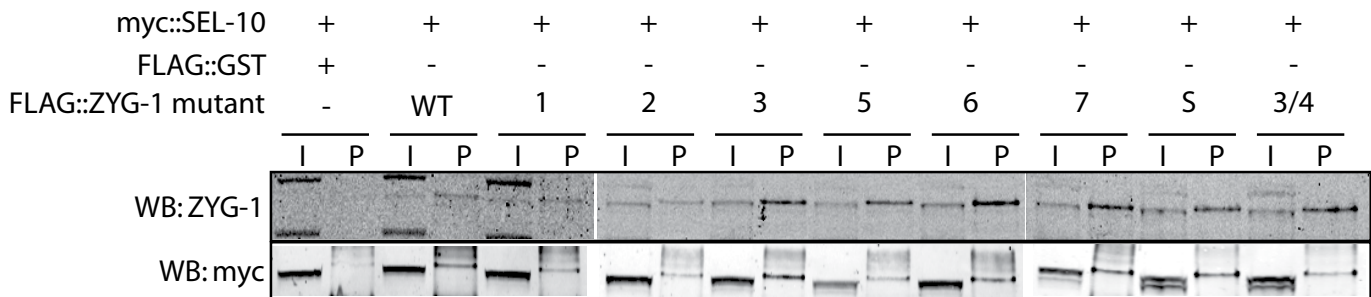

**Fig. S2.** Analysis of ZYG-1 and SEL-10 binding. A) Diagram of ZYG-1 indicating the position of the putative Slimb-binding motif (S) and putative SEL-10 binding motifs (1-7). The full-length ZYG-1 protein sequences from *C. elegans*, *C. briggsae* and *C. remanei* were aligned using the ClustalW algorithm and alignments of the region containing the *C. elegans* Slimb-binding motif are shown. The asterisks denote the essential phospho-residues of the *C. elegans* Slimb-binding motif that would be essential for substrate recognition. B) Position and sequence of each putative CPD. Fourth column indicates mutations made in the FLAG::ZYG-1 construct and which were used for the immunoprecipitations shown in C. C) FLAG-tagged WT or mutant ZYG-1 and myc::SEL-10 were expressed in HEK293T cells. Proteins were immunoprecipitated with FLAG beads and probed with ZYG-1 (to detect FLAG::ZYG-1) and MYC antibodies (to detect myc::SEL-10). I= input, P= immunoprecipitate.

Table S1. *C. elegans* strains used in this study

| Strain Name | Genotype                                                                                                 | Source                   |
|-------------|----------------------------------------------------------------------------------------------------------|--------------------------|
| OC14        | zyg-1(it25)                                                                                              | (Kemp et al., 2007)      |
| OC341       | unc-119(ed4); bsIs8[pMS5.1 in pID3.01:unc-119(+) pie-1-GFP-zyg-1C-terminus]                              | (Peters et al., 2010)    |
| RB1432      | sel-10(ok1632)                                                                                           | Gene Knockout Consortium |
| OC156       | unc-119(ed4); zyg-1(it25); ruIs32[unc-119(+) pie-1::GFP::H2B] III;bsIs2 [pCK5.5: pie-1-gfp-spd-2]        | (Song et al., 2008)      |
| OH1476      | lin-23(ot1) II; oxIs12 X                                                                                 | (Hebeisen and Roy, 2008) |
| OC570       | zyg-1(it25) lin-23(ot1)II; bsIs2 [pCK5.5: pie-1-gfp-spd-2];ltIs37[pAA64: unc-119(+) pie-1-mcherry-his58] | This study               |
| OC577       | zyg-1(it25); bsIs2 [pCK5.5: pie-1-gfp-spd-2];fem-1(hc17);sel-10(ok1632)                                  | This study               |
| OC495       | zyg-1(it25)II; bsIs2 [pCK5.5: pie-1-gfp-spd-2];ltIs37[pAA64: unc-119(+) pie-1-mcherry-his58]             | This study               |
| OC554       | zyg-1(it25) lin-23(ot1)II                                                                                | This study               |
| OC564       | zyg-1(it25); bsIs2 [pCK5.5: pie-1-gfp-spd-2]; fem-1(hc17)                                                | This study               |
| OC590       | zyg-1(it25) lin-23(ot1); bsIs2 [pCK5.5: pie-1-gfp-spd-2]; fem-1(hc17); sel-109ok1632)                    | This study               |

**Table S1.** *C. elegans* strains used in this study
